# Supplementary material for: Exfoliation of large-flake, few-layer MoS2 nanosheets mediated by carbon nanotubes
Source: Royal Society of Chemistry journal article supplement (doi:10.1039/d1cc00673h), 2021-01-01
Supplement: d1cc00673h1.pdf [file d1cc00673h1.pdf]

## Electronic Supporting Information

### Exfoliation of large-flake, few-layer MoS<sub>2</sub> nanosheets mediated by carbon nanotubes

Wenqian Han,<sup>a</sup> Yan Xia,<sup>b</sup> Dong Yang<sup>\*b</sup> and Angang Dong<sup>\*a</sup>

<sup>a</sup>*Shanghai Key Laboratory of Molecular Catalysis and Innovative Materials and Department of Chemistry, Fudan University, Shanghai 200433, China.*

<sup>b</sup>*State Key Laboratory of Molecular Engineering of Polymers and Department of Macromolecular Science, Fudan University, Shanghai 200433, China.*

#### Experimental Section

**Chemicals.** Bulk MoS<sub>2</sub> powder, bulk WS<sub>2</sub> powder, ammonium tetrathiotungstate ((NH<sub>4</sub>)<sub>2</sub>MoS<sub>4</sub>, 99.9%), and Nafion (5 wt%) were purchased from Sigma-Aldrich. Carbon nanotubes powder (CNTs, 20 nm in diameter) and graphite powder were purchased from Qingdao Haoxin Co. Ltd (China). Sodium 2-naphthalenesulfonate (SNS, 85%) was purchased from Aladdin. All chemicals were used as received without further purification.

**Preparation of CNT dispersions.** 4 g of CNT powder and 1 g of SNS were mixed in 995 g of ethanol. The resulting mixture was then sonicated for 30 min to obtain a homogeneous CNT dispersion (0.4 wt%).

**Exfoliation of MoS<sub>2</sub> nanosheets.** Both commercial and home-made MoS<sub>2</sub> crystals can be used as precursors for preparing large-flake MoS<sub>2</sub> nanosheets, although home-made MoS<sub>2</sub> may give rise to a higher exfoliation efficiency. Home-made bulk MoS<sub>2</sub>

crystals were synthesized by heating 10 g of  $(\text{NH}_4)_2\text{MoS}_4$  at 450 °C under Ar/H<sub>2</sub> (95%:5% by volume) for 2 h. To prepare exfoliated MoS<sub>2</sub> nanosheets, commercial MoS<sub>2</sub> powder (5 g) or home-made MoS<sub>2</sub> crystals was added into 500 g of the above prepared CNT dispersion in a flask. The resulting mixture was then subjected to sonication using a benchtop sonicator (Derui M07, 80 W), resulting in a black suspension after 30 min. To remove CNTs, the exfoliation mixture was heated at 50 °C for 15 min, inducing the sedimentation of CNTs. The yellowish supernatant was collected by centrifugation for further use. The supernatant containing MoS<sub>2</sub> nanosheets and residual CNTs was allowed to evaporate at 60 °C for 30 min to obtain a solid powder, which could be directly used for preparing working electrodes for subsequent electrochemical applications. The exfoliation of WS<sub>2</sub> and graphene nanosheets was carried out by replacing bulk MoS<sub>2</sub> with bulk WS<sub>2</sub> and graphite while keeping other exfoliation conditions constant.

**Characterization.** Transmission electron microscopy (TEM) and high-resolution TEM (HRTEM) were obtained on a Tecnai G2 F20 S-Twin microscope operated at 200 kV. Aberration-corrected high-angle annular dark-field scanning TEM (HAADF-STEM) was carried out on a JEM-ARM200F microscope operated at 200 kV. Scanning electron microscopy (SEM) was conducted on a Zeiss Ultra-55 microscope operated at 5 kV. Powder X-ray diffraction (XRD) was performed on a Bruker D4 X-ray diffractometer (40 kV, 40 mA). X-ray photoelectron spectroscopy (XPS) was conducted on a Perkin Elmer PHI-5000C ESCA system. Raman measurements were obtained on an XploRA Raman system. Nitrogen adsorption-desorption isotherms were obtained on

an ASAP 2020 system. All samples were degassed under vacuum at 180 °C for at least 8 h prior to measurement. The pore size distributions were derived from the adsorption branch of the isotherms using the Barrett-Joyner-Halenda (BJH) model. Thermogravimetric analysis (TGA) was carried out on a Perkin-Elmer Pyris 1 thermogravimetric analyzer. Fourier-transform infrared (FTIR) spectra were acquired using a PerkinElmer Spectrum Two spectrometer. AFM was carried out on a Bruker Fastscan AFM instrument in the tapping mode. The sample was made by dropping the exfoliated MoS<sub>2</sub> nanosheet ethanol dispersion on a clean SiO<sub>2</sub>/Si substrate followed by drying in air.

**Electrochemical tests (HER).** All electrochemical measurements were carried out on an AutoLab 204N (Metrohm) electrochemical workstation with a three-electrode system in 0.5 M H<sub>2</sub>SO<sub>4</sub>. A saturated calomel electrode (SCE), a graphitic rod and a glassy carbon electrode (GCE) with a diameter of 3 mm were used as reference electrode, counter electrode and working electrode, respectively. MoS<sub>2</sub> nanosheets (1 mg) and nafion (5 wt%, 6 μL) were dispersed in ethanol (250 μL) and sonicated for at least 40 min to obtain homogeneous inks. Afterwards, the inks were drop-cast onto the glassy carbon electrode followed by drying. Linear sweep voltammetry (LSV) was measured at a scan rate of 10 mV/s. Electrochemical impedance spectroscopy (EIS) was tested in the frequency range of 10<sup>6</sup>-10<sup>-2</sup> Hz. All the electrochemical measurements were calibrated with a reversible hydrogen electrode (RHE). Cyclic voltammograms (CV) were carried out in the potential window of 0.1-0.2 V (vs. RHE) with scan rates

varying from 60 to 100 mV/s and were further used to calculate the double-layer capacitance ( $C_{dl}$ ).

**Electrochemical tests (SIBs).** The sodium-storage performance was evaluated using two electrode CR2016 coin-type cells. The working electrodes were prepared by a slurry-coating procedure. The exfoliated MoS<sub>2</sub> nanosheets and polyvinylidene fluoride (PVDF) binder with a mass ratio of 9:1 were dispersed in N-methyl-2-pyrrolidinone (NMP) to prepare a slurry. This slurry was uniformly painted on a copper foil current collector. The electrodes were dried at 90 °C under vacuum overnight. The electrolyte was a 1.0 M NaClO<sub>4</sub> solution in a volume ratio of 50:50 mixture of ethylene carbonate and ethyl methyl carbonate. And the separator was a glass fibre film (Whatman). Cyclic voltammetry (CV) was measured on a CHI 660E electrochemical workstation. Galvanostatic tests were carried out on a Neware cell test system with a voltage range of 0.01-3 V.

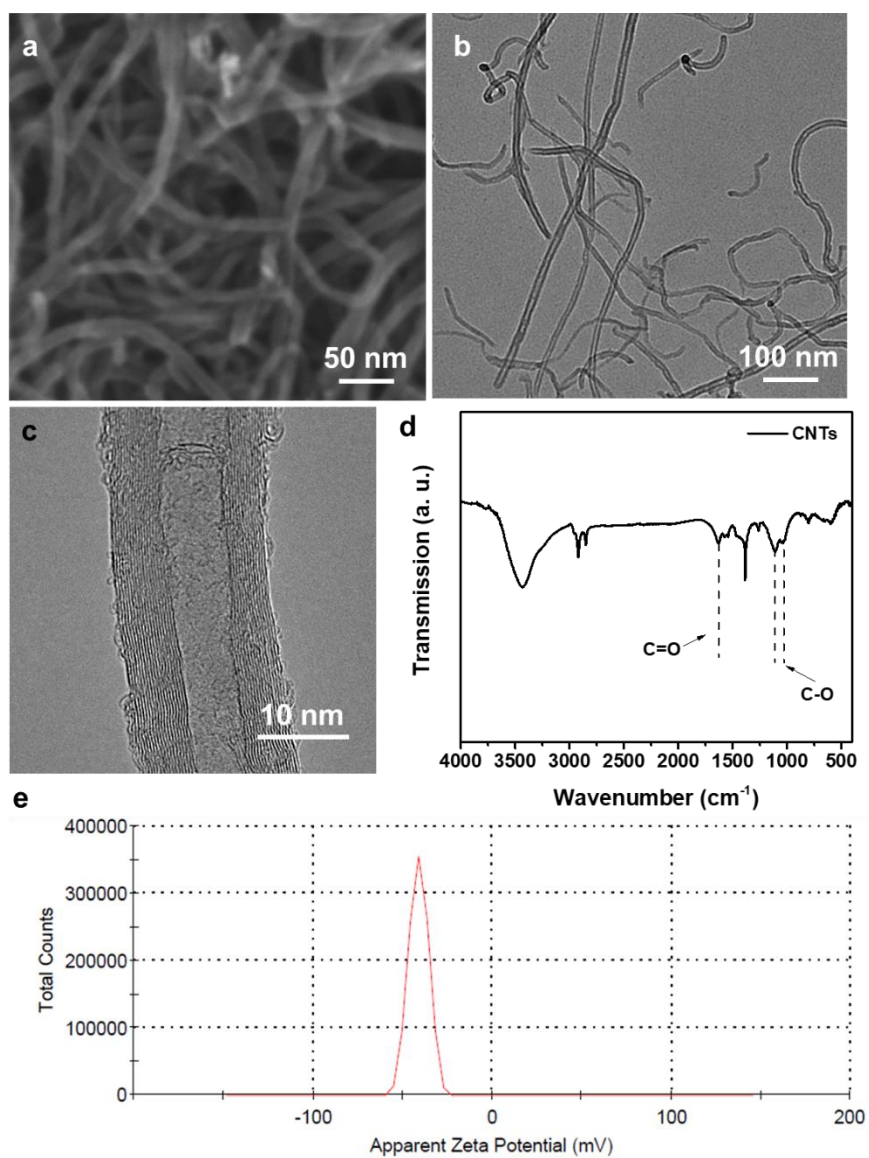

**Fig. S1** (a) SEM and (b) TEM images of CNTs with a diameter of  $\sim 20$  nm, which were used for exfoliating bulk MoS<sub>2</sub>. (c) HRTEM image, (d) FTIR spectrum, and (e) zeta potential measurements of CNTs. The characteristic peaks at  $1635\text{ cm}^{-1}$  (C=O stretching mode),  $1046\text{ cm}^{-1}$ , and  $1092\text{ cm}^{-1}$  (C-O stretching modes) in the FTIR spectrum suggest the presence of a certain amount of oxygen-containing functional groups at the CNT surface.

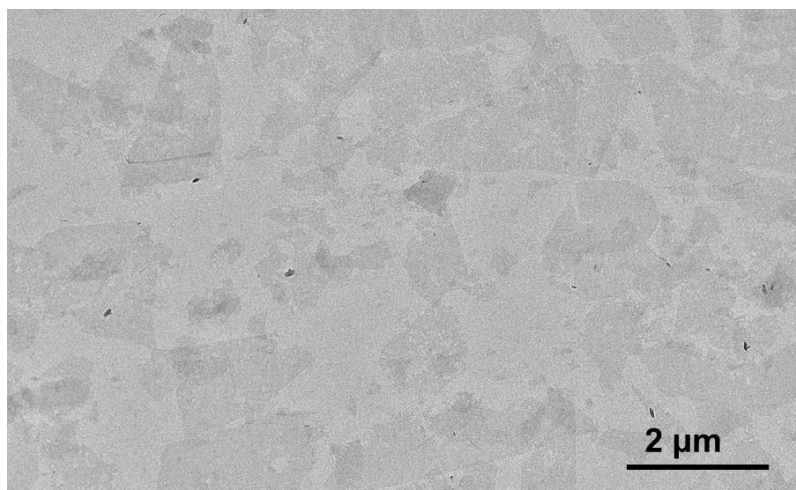

**Fig. 2** Low-magnification TEM image of exfoliated large-flake MoS<sub>2</sub> nanosheets.

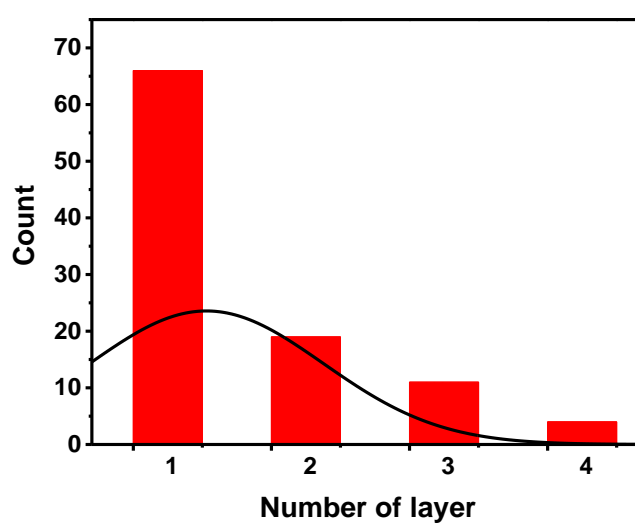

**Fig. S3** Layer number distribution histograms of exfoliated MoS<sub>2</sub> nanosheets.

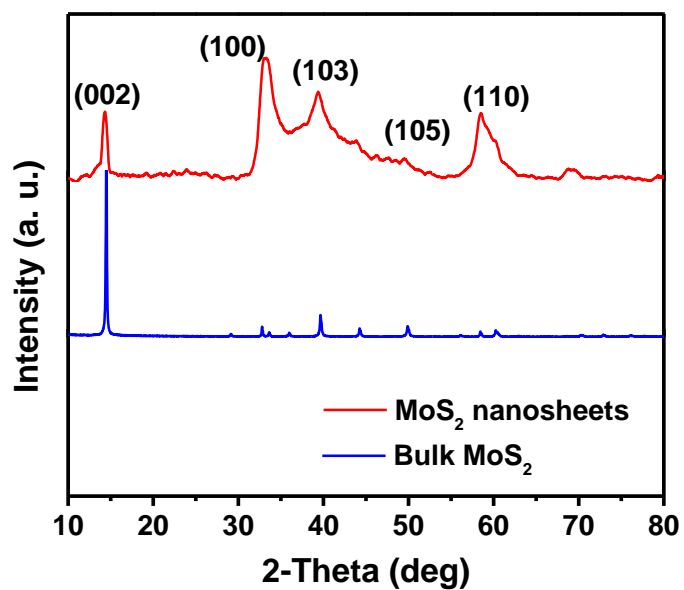

**Fig. S4** XRD pattern of MoS<sub>2</sub> nanosheets obtained by exfoliation with SNS only. The XRD pattern of bulk MoS<sub>2</sub> was also added for comparison. The much sharper diffraction peaks compared with few-layer MoS<sub>2</sub> in Fig. 3a indicates that MoS<sub>2</sub> nanosheets obtained by exfoliation with SNS only have thicker layer thickness.

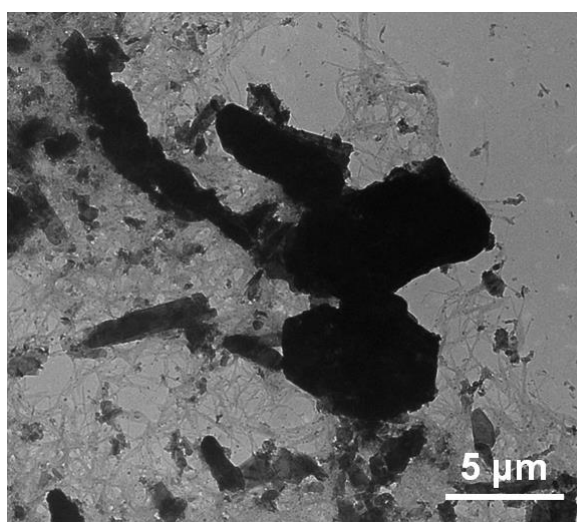

**Fig. S5** TEM image of MoS<sub>2</sub> flakes resulting from exfoliation of bulk MoS<sub>2</sub> with CNTs only.

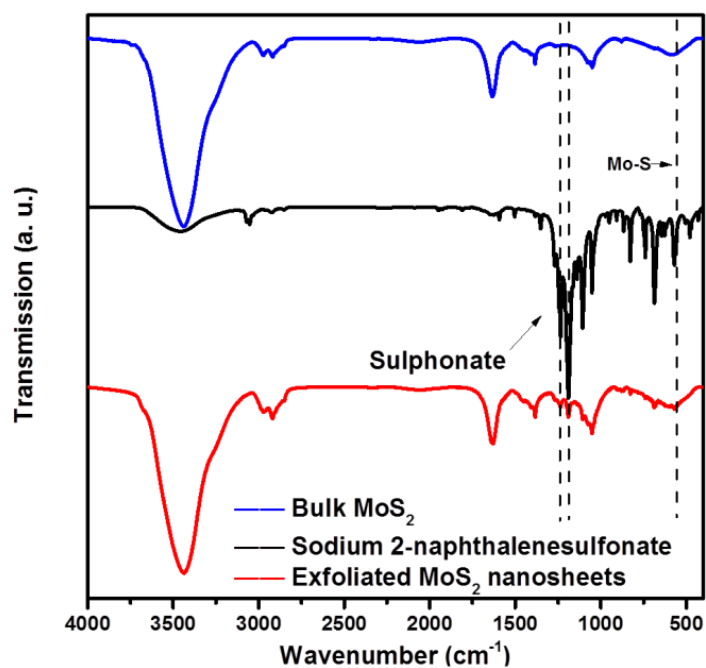

**Fig. S6** FTIR spectra of bulk MoS<sub>2</sub>, as-exfoliated MoS<sub>2</sub> nanosheets (after 50 °C treatment) and SNS. For MoS<sub>2</sub> nanosheets, the emergence of sulphonate group at 1190 and 1234 cm<sup>-1</sup> suggests that SNS acts as surfactant to stabilize MoS<sub>2</sub> nanosheets in ethanol.

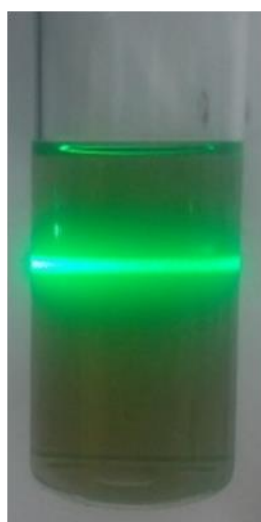

**Fig. S7** Photograph of a MoS<sub>2</sub> nanosheets ethanol dispersion after a week, showing its high colloidal stability.



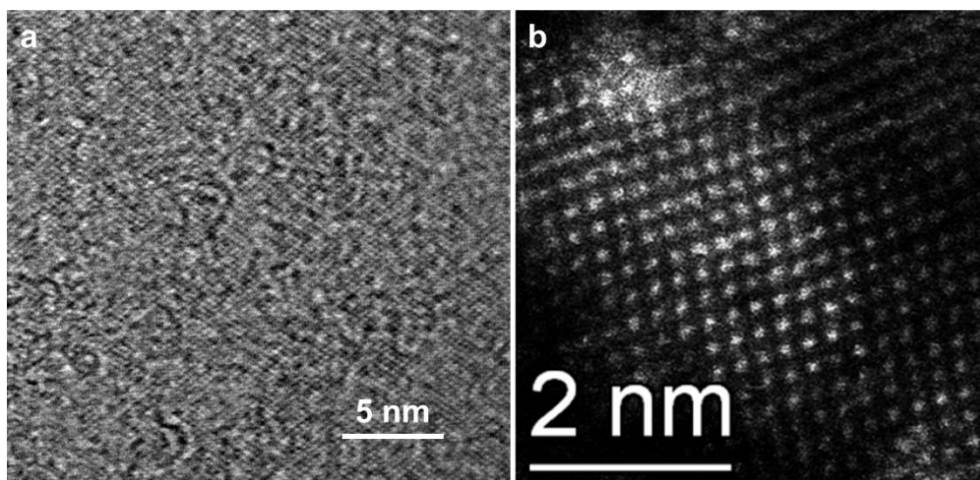

**Fig. S8** (a) HRTEM and (b) aberration-corrected HAADF-STEM images of exfoliated MoS<sub>2</sub> nanosheets, showing the high single crystallinity.

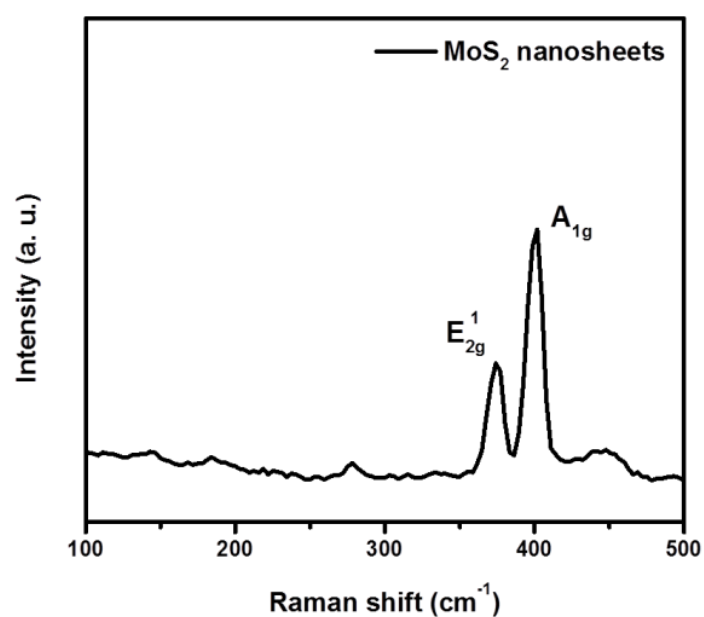

**Fig. S9** Raman spectrum of exfoliated MoS<sub>2</sub> nanosheets. The characteristics peaks ( $J_1$ -157 cm<sup>-1</sup>,  $J_2$ -226 cm<sup>-1</sup> and  $J_3$ -330 cm<sup>-1</sup>) ascribed to 1T-phase MoS<sub>2</sub> were not observable, confirming the 2H-phase of exfoliated MoS<sub>2</sub> nanosheets,

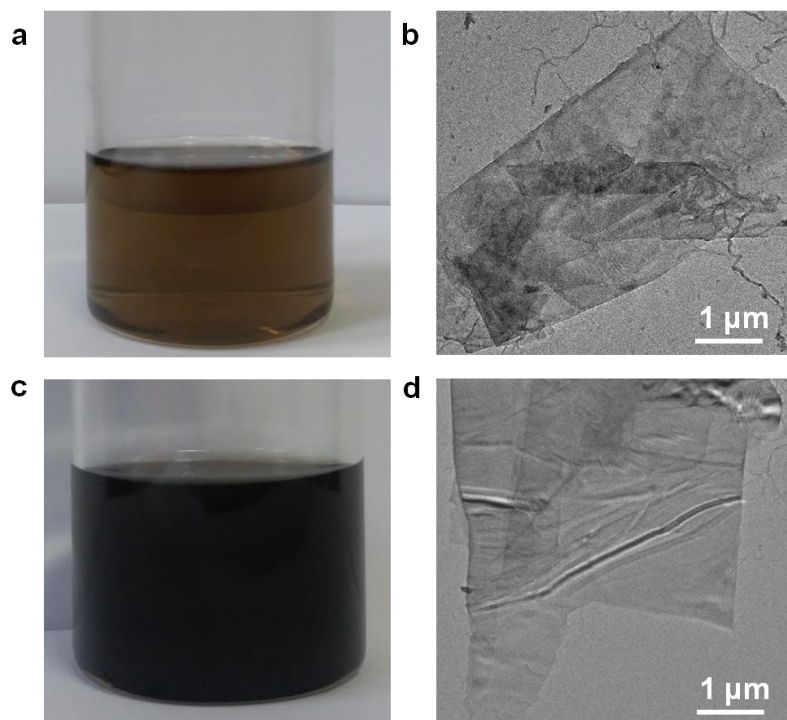

**Fig. S10.** Photographs and TEM images of (a, b) WS<sub>2</sub> and (c, d) graphene nanosheets obtained by CNT-mediated exfoliation.

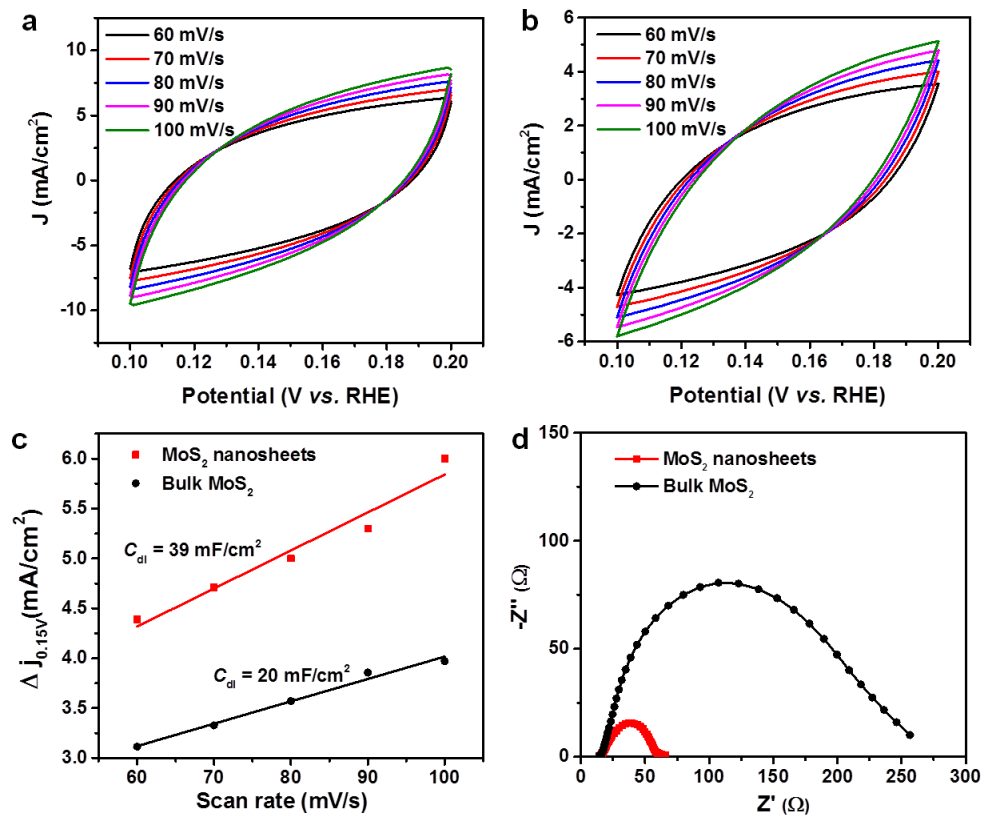

**Fig. S11** CV curves of (a) exfoliated MoS<sub>2</sub> nanosheets and (b) bulk MoS<sub>2</sub>. (c) Plots of  $C_{dl}$  for exfoliated MoS<sub>2</sub> nanosheets and bulk MoS<sub>2</sub>. (d) Nyquist plots of exfoliated MoS<sub>2</sub> nanosheets and bulk MoS<sub>2</sub> when evaluated as electrocatalysts for the HER.

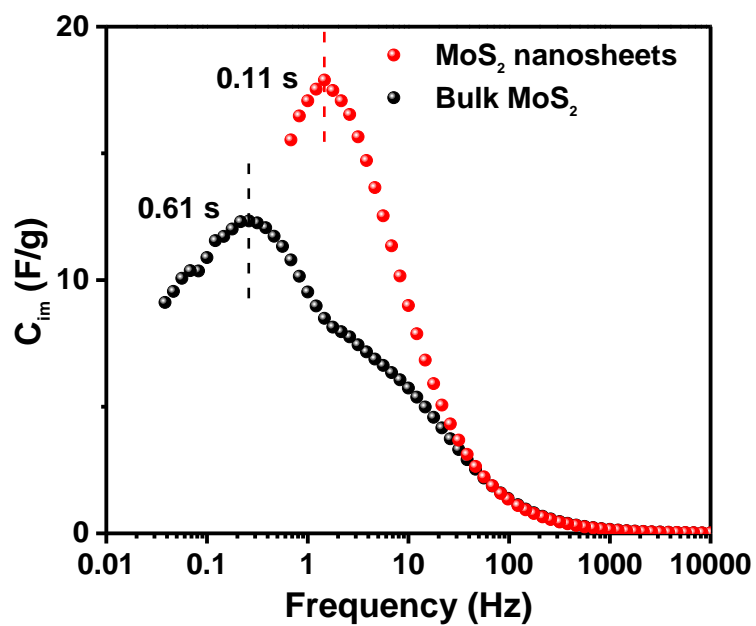

**Fig. S12** Imaginary part of complex capacitance ( $C_{im}$ ) as a function of frequency ( $f$ ). The relaxation time constant ( $\tau_0$ ) was calculated from the peak frequency using  $\tau_0 = (2\pi f)^{-1}$ .

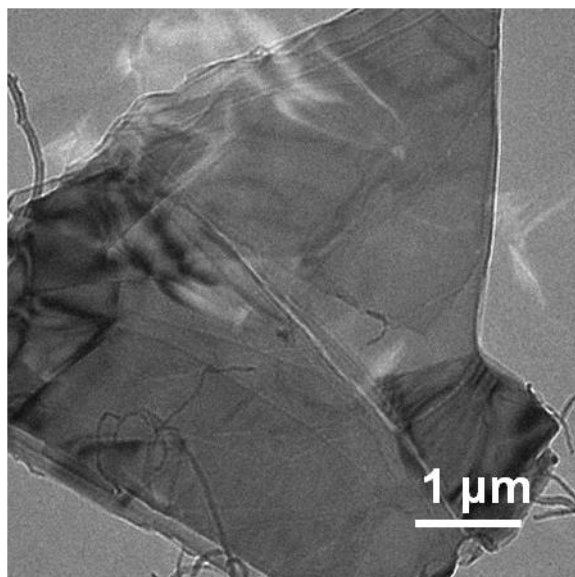

**Fig. S13** TEM image of MoS<sub>2</sub> nanosheets after 5000 HER cycles.

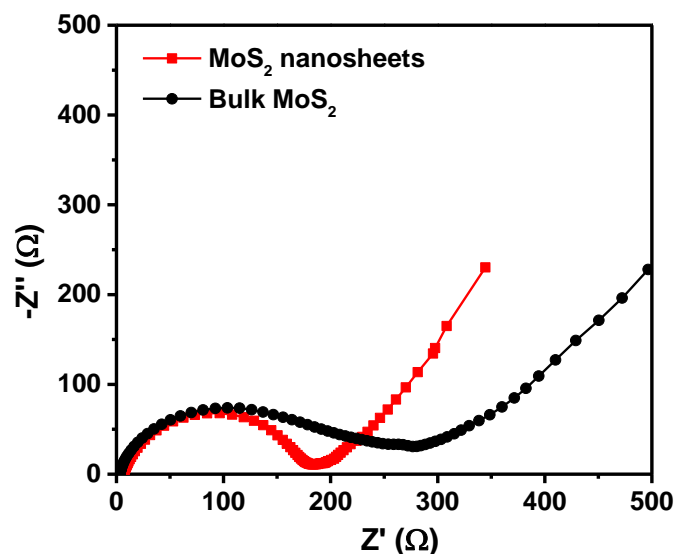

**Fig. S14** EIS plots of MoS<sub>2</sub> nanosheets and bulk MoS<sub>2</sub> when evaluated as anodes for SIBs.

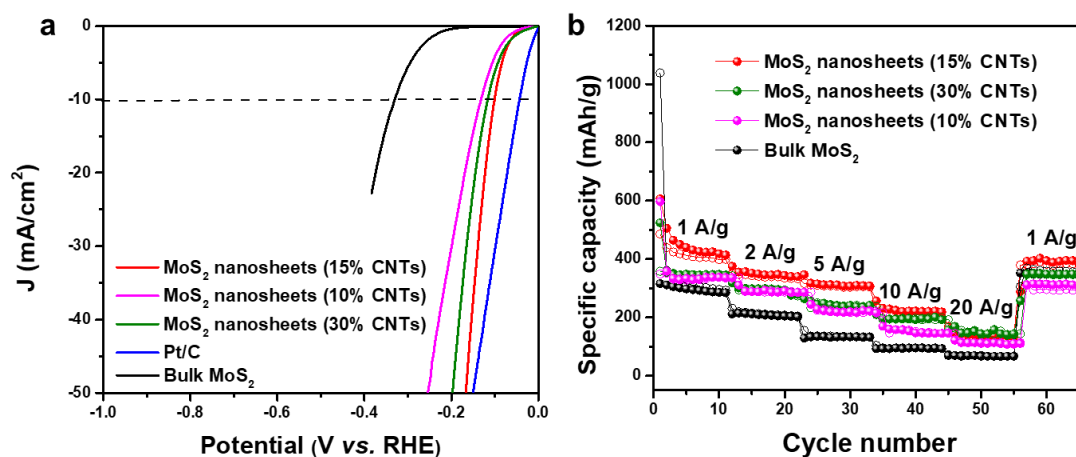

**Fig. S15** (a) LSV curves and (b) rate performance of MoS<sub>2</sub> nanosheets with different CNT contents.

The HER activity of 15 wt% and 30 wt% samples are close, which is superior to that of their 10 wt% counterpart, demonstrating that increasing the content of CNTs is important for enhancing the HER activity. Presumably, CNTs not only increase the electrical conductivity, but also prevent the self-stacking of MoS<sub>2</sub> nanosheets, both of which are desirable for boosting the HER. In case of sodium-ion batteries, however, more active materials are desirable in order to achieve a high sodium-storage capacity. Rate-capability measurements show that the rate performance of MoS<sub>2</sub> nanosheets with 30 wt% CNTs is inferior to that of the 15 wt% sample, probably due to the insufficient amount of active materials. Taken together, both HER and SIB results clearly demonstrate that CNTs play a key role in enhancing electrochemical performance, and ~15 wt% of CNTs is an optimal content.

**Table S1.** Exfoliation yield comparison between our method and other exfoliation methods reported previously.

| Exfoliation methods                      | Solvent             | Yield (%) | Ref.      |
|------------------------------------------|---------------------|-----------|-----------|
| CNTs-mediated exfoliation                | Ethanol             | 45        | This work |
| Liquid exfoliation                       | NMP                 | 40        | [1]       |
| Ethylenediamine-assisted exfoliation     | Propylene carbonate | 23.2      | [2]       |
| n-Butyllithium intercalation exfoliation | Hexanes             | 11-15     | [3]       |
| Aqueous surfactant solutions exfoliation | Deionized water     | 10        | [4]       |
| Shear exfoliation                        | NMP                 | 4.8       | [5]       |
| Shear exfoliation                        | Deionized water     | 0.8       | [6]       |

**Table S2.** HER performance comparison between our exfoliated MoS<sub>2</sub> nanosheets and 2H-MoS<sub>2</sub> catalysts reported previously.

| Catalysts                                             | Electrolyte                        | Overpotential (mV)<br>at 10 mA/cm <sup>2</sup> | Tafel slope<br>(mV/dec) | Ref.      |
|-------------------------------------------------------|------------------------------------|------------------------------------------------|-------------------------|-----------|
| MoS <sub>2</sub> nanosheets/CNTs                      | 0.5 H <sub>2</sub> SO <sub>4</sub> | -101                                           | 43                      | This work |
| Freestanding MoS <sub>2</sub><br>monolayers           | 0.5 H <sub>2</sub> SO <sub>4</sub> | -156                                           | 58                      | [7]       |
| Edge-oriented<br>MoS <sub>2</sub> /rGO                | 0.5 H <sub>2</sub> SO <sub>4</sub> | -129                                           | 43                      | [8]       |
| Nafion-assisted<br>exfoliated MoS <sub>2</sub>        | 0.5 H <sub>2</sub> SO <sub>4</sub> | -609                                           | 106                     | [9]       |
| Plasma exfoliated<br>MoS <sub>2</sub>                 | 0.5 H <sub>2</sub> SO <sub>4</sub> | -118                                           | 73                      | [10]      |
| Electrochemically<br>exfoliated MoS <sub>2</sub>      | 0.5 H <sub>2</sub> SO <sub>4</sub> | -127                                           | 199                     | [11]      |
| Conducting MoS <sub>2</sub><br>nanosheets             | 0.5 H <sub>2</sub> SO <sub>4</sub> | -250                                           | 75                      | [12]      |
| Strained MoS <sub>2</sub> with S-<br>vacancies        | 0.5 H <sub>2</sub> SO <sub>4</sub> | -170                                           | 60                      | [13]      |
| MoS <sub>2</sub> @graphene                            | 0.5 H <sub>2</sub> SO <sub>4</sub> | ~-230                                          | 46                      | [14]      |
| MoS <sub>2</sub> foams                                | 0.5 H <sub>2</sub> SO <sub>4</sub> | -156                                           | 74                      | [15]      |
| P-doped 2H-MoS <sub>2</sub>                           | 0.5 H <sub>2</sub> SO <sub>4</sub> | ~-225                                          | 49                      | [16]      |
| 3D MoS <sub>2</sub> van der<br>Waals heterostructures | 0.5 H <sub>2</sub> SO <sub>4</sub> | -243                                           | 82.5                    | [17]      |

**Table S3.** SIB performance comparison between our exfoliated MoS<sub>2</sub> nanosheets and representative state-of-the-art 2H-MoS<sub>2</sub> anode materials reported previously.

| Anodes                                                | Voltage range (V) | Current density (A/g)/capacity retention (mAh/g)/cycle number | Ref.      |
|-------------------------------------------------------|-------------------|---------------------------------------------------------------|-----------|
| MoS <sub>2</sub> nanosheets/CNTs                      | 0.01-3            | 2/280/500                                                     | This work |
| Ultrathin MoS <sub>2</sub> nanosheets                 | 0.01-3            | 0.04/386/100                                                  | [18]      |
| Interlayer expanded MoS <sub>2</sub> nanoribbons      | 0.01-3            | 5/158/1500                                                    | [19]      |
| Ultrathin MoS <sub>2</sub> @MOFs                      | 0.01-3            | 1/265/1000                                                    | [20]      |
| Hybrid MoS <sub>2</sub> @graphene                     | 0.01-3            | 0.3/421/250                                                   | [21]      |
| Low crystalline MoS <sub>2</sub> nanoflakes           | 0.01-3            | 2/337/800                                                     | [22]      |
| MoS <sub>2</sub> nanosheets@mesoporous carbon spheres | 0.01-3            | 1/200/300                                                     | [23]      |
| Monolayer-rich MoS <sub>2</sub> nanosheets            | 0.01-3            | 0.1/385/100                                                   | [24]      |

### Reference

1. A. O'Neill, U. Khan and J. N. Coleman, *Chem. Mater.*, 2012, **24**, 2414-2421.
2. A. Ghorai, S. K. Ray and A. Midya, *ACS Applied Nano Materials*, 2019, **2**, 1170-1177.
3. X. Fan, P. Xu, Y. C. Li, D. Zhou, Y. Sun, M. A. T. Nguyen, M. Terrones and T. E. Mallouk, *J. Am. Chem. Soc.*, 2016, **138**, 5143-5149.
4. R. J. Smith, P. J. King, M. Lotya, C. Wirtz, U. Khan, S. De, A. O'Neill, G. S. Duesberg, J. C. Grunlan, G. Moriarty, J. Chen, J. Wang, A. I. Minett, V. Nicolosi and J. N. Coleman, *Adv. Mater.*, 2011, **23**, 3944-3948.
5. Y. Li, X. Yin and W. Wu, *Ind. Eng. Chem. Res.*, 2018, **57**, 2838-2846.
6. E. Varrla, C. Backes, K. R. Paton, A. Harvey, Z. Gholamvand, J. McCauley and J. N. Coleman, *Chem. Mater.*, 2015, **27**, 1129-1139.
7. X. Hai, W. Zhou, S. Wang, H. Pang, K. Chang, F. Ichihara and J. Ye, *Nano Energy*, 2017, **39**, 409-417.
8. Y. Sun, F. Alimohammadi, D. Zhang and G. Guo, *Nano Lett.*, 2017, **17**, 1963-1969.
9. N. K. Oh, H. J. Lee, K. Choi, J. Seo, U. Kim, J. Lee, Y. Choi, S. Jung, J. H. Lee, H. S. Shin and H. Park, *Chem. Mater.*, 2018, **30**, 4658-4666.
10. V. Nguyen, P. A. Le, Y. Hsu and K. Wei, *ACS Appl. Mater. Inter.*, 2020, **12**, 11533-11542.
11. X. Pan, M. Yan, C. Sun, K. Zhao, W. Luo, X. Hong, Y. Zhao, L. Xu and L. Mai,



- Adv. Funct. Mater.*, 2020, 2007840.
12. D. Voiry, M. Salehi, R. Silva, T. Fujita, M. Chen, T. Asefa, V. B. Shenoy, G. Eda and M. Chhowalla, *Nano Lett.*, 2013, **13**, 6222-6227.
  16. H. Li, C. Tsai, A. L. Koh, L. Cai, A. W. Contryman, A. H. Fragapane, J. Zhao, H. S. Han, H. C. Manoharan, F. Abild-Pedersen, J. K. Nørskov and X. Zheng, *Nat. Mater.*, 2016, **15**, 48-53.
  14. Y. Li, J. Wang, X. Tian, L. Ma, C. Dai, C. Yang and Z. Zhou, *Nanoscale*, 2016, **8**, 1676-1683.
  15. J. Deng, H. Li, S. Wang, D. Ding, M. Chen, C. Liu, Z. Tian, K. S. Novoselov, C. Ma, D. Deng and X. Bao, *Nat. Commun.*, 2017, **8**, 14430.
  16. X. Huang, M. Leng, W. Xiao, M. Li, J. Ding, T. L. Tan, W. S. V. Lee and J. Xue, *Adv. Funct. Mater.*, 2017, **27**, 1604943.
  17. C. Tang, L. Zhong, B. Zhang, H. Wang and Q. Zhang, *Adv. Mater.*, 2018, **30**, 1705110.
  18. D. Su, S. Dou and G. Wang, *Adv. Energy Mater.*, 2015, **5**, 1401205.
  19. Y. Liu, X. Wang, X. Song, Y. Dong, L. Yang, L. Wang, D. Jia, Z. Zhao and J. Qiu, *Carbon*, 2016, **109**, 461-471.
  20. W. Ren, H. Zhang, C. Guan and C. Cheng, *Adv. Funct. Mater.*, 2017, **27**, 1702116.
  21. D. Sun, D. Ye, P. Liu, Y. Tang, J. Guo, L. Wang and H. Wang, *Adv. Energy Mater.*, 2018, **8**, 1702383.
  22. T. Wu, M. Jing, Y. Liu and X. Ji, *J. Mater. Chem A*, 2019, **7**, 6439-6449.
  23. M. Hou, Y. Qiu, G. Yan, J. Wang, D. Zhan, X. Liu, J. Gao and L. Lai, *Nano Energy*, 2019, **62**, 299-309.
  24. Y. Li, K. Chang, E. Shangguan, D. Guo, W. Zhou, Y. Hou, H. Tang, B. Li and Z. Chang, *Nanoscale*, 2019, **11**, 1887-1900.
